# Supplementary material
Source: MDPI journal article supplement (https://www.mdpi.com/1424-2818/14/12/1133)
Supplement: s1 [file s1]

**Table S1.** Origin data and GenBank accession numbers for the studied clones of *Nitzschia acidoclinata*.

| №  | Clone  | Habitat and locality                                                                                                         | Sampling date     | GenBank accession no. | Average annual temperature, °C | Average annual rainfall, mm |
|----|--------|------------------------------------------------------------------------------------------------------------------------------|-------------------|-----------------------|--------------------------------|-----------------------------|
| 1. | VCA-7  | Wet ground from the Gonduras Cave, Krasnoyarsk Territory, 55.847420 N, 92.197710 E.                                          | February 19, 2011 | OM423716              | nd                             | nd                          |
| 2. | VCA-48 | Waterlogged soil from the territory of the Natural Reserve “Pleistocene Park”, Republic of Sakha, 68.511147 N, 161.508531 E. | July 2018         | OM423714              | -12.7                          | 156                         |
| 3. | VCA-49 | Waterlogged soil from the territory of the Natural Reserve “Pleistocene Park”, Republic of Sakha, 68.511147 N, 161.508531 E. | July 2018         | OM423713              | -12.7                          | 156                         |
| 4. | VCA-50 | Waterlogged soil from the territory of the Natural Reserve “Pleistocene Park”, Republic of Sakha, 68.511317 N, 161.505204 E. | July 2018         | OM423715              | -12.7                          | 156                         |
| 5. | VCA-51 | Wet ground from the Spyashchaya Krasavica Cave, Primorsky Krai, 43.640767 N, 132.561367 E.                                   | December 04, 2019 | OM423717              | nd                             | nd                          |
| 6. | VCA-52 | Waterlogged soil from the State Nature Reserve “Bastak”, Jewish Autonomous Region, 48.433217 N, 134.222283 E.                | June 29, 2021     | OM423718              | 1.5                            | 673                         |

Notes: Average annual temperature and average annual rainfall are given according <https://ru.climate-data.org/>; nd – no data.
